# Supplementary material
Source: PubMed Central journal article supplement (PMC6193883)

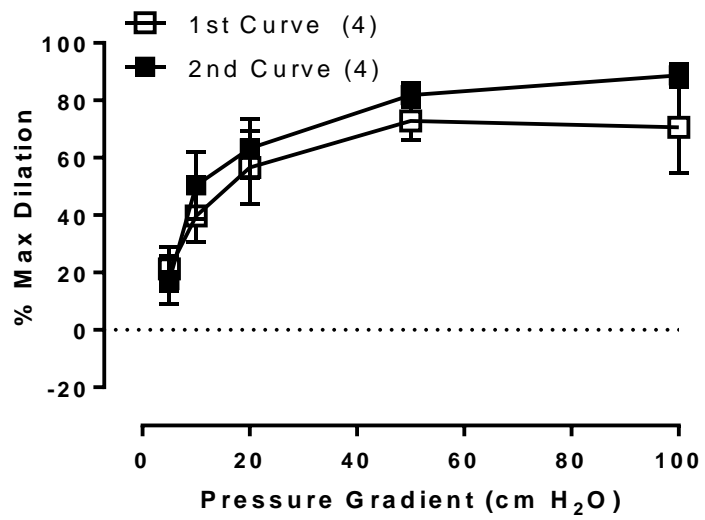

Supplemental Figure 1.

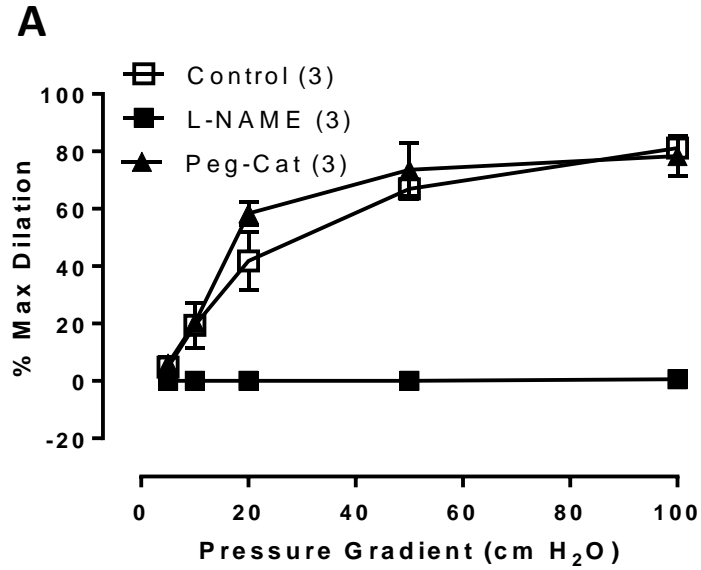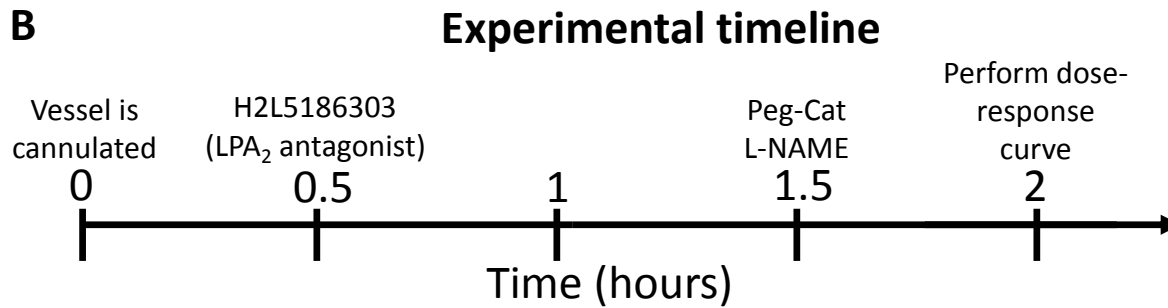

Supplemental Figure 2.

**A**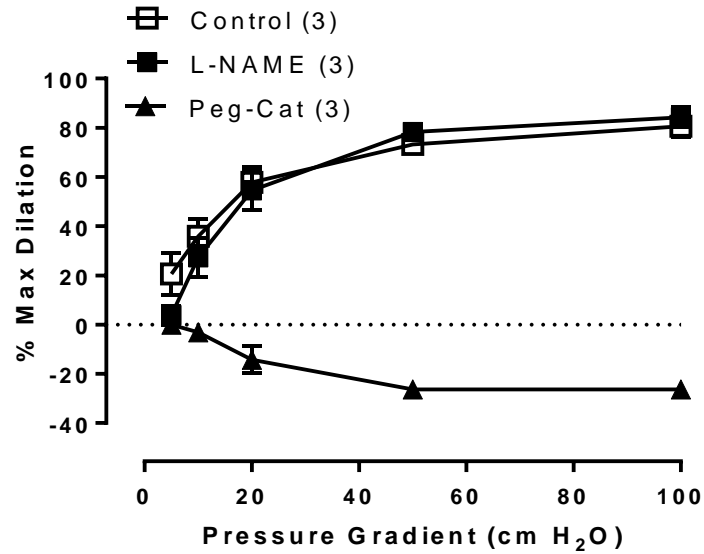**B****Experimental timeline**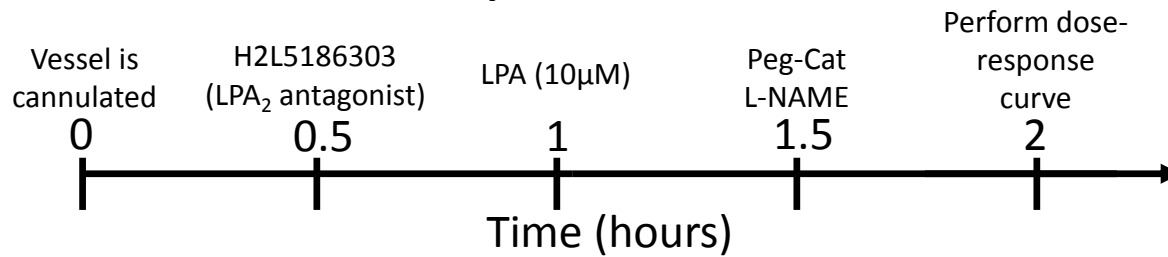

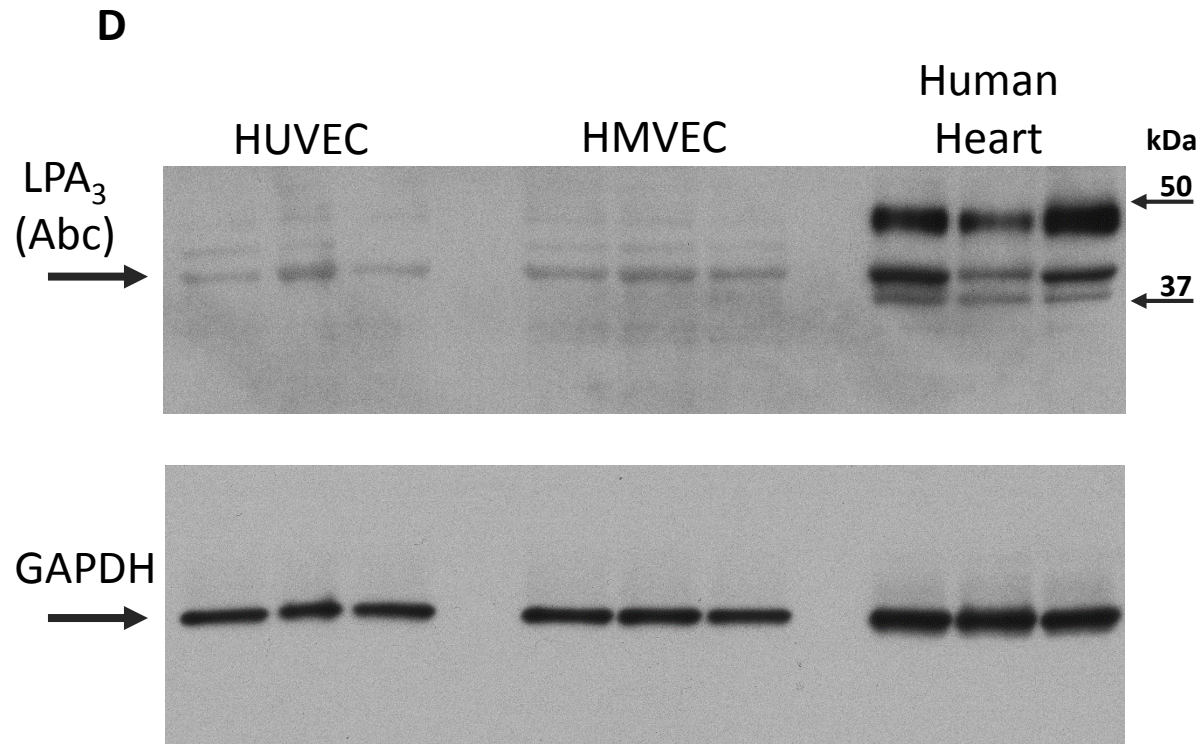

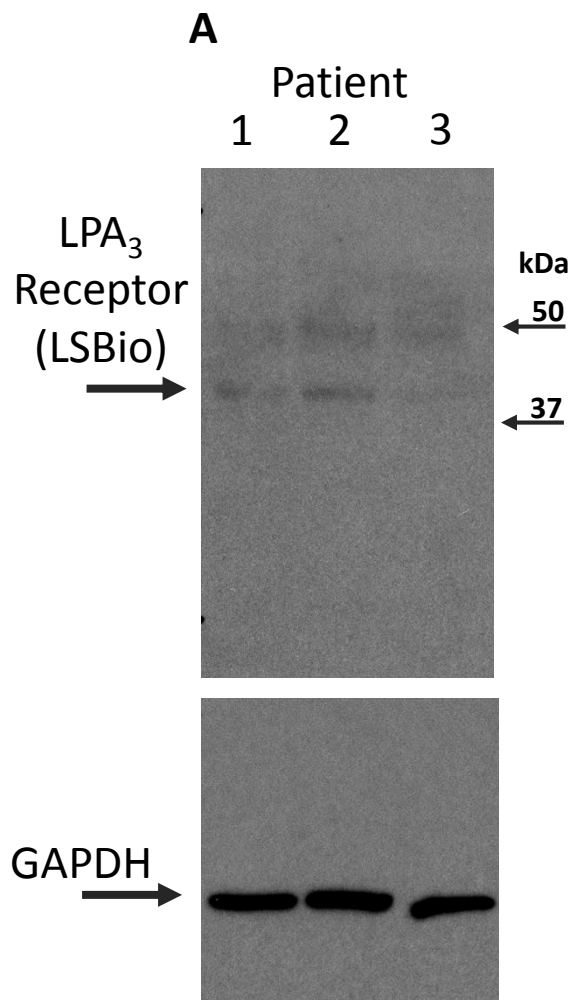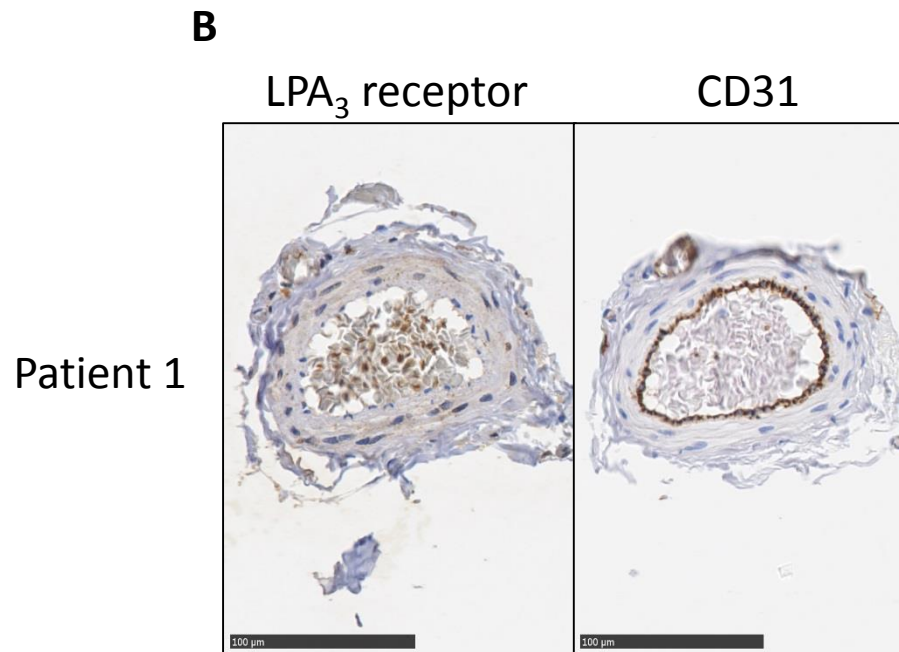

Supplemental Figure 5.

**A**

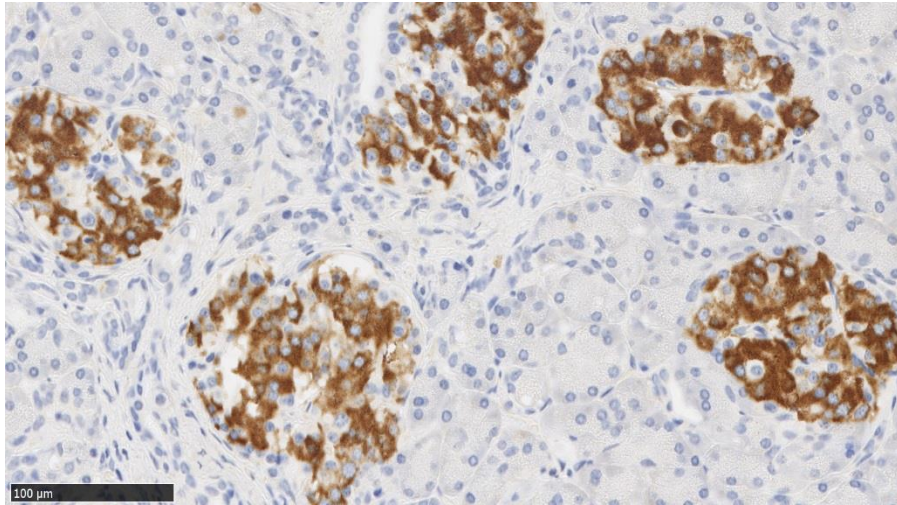

**B**

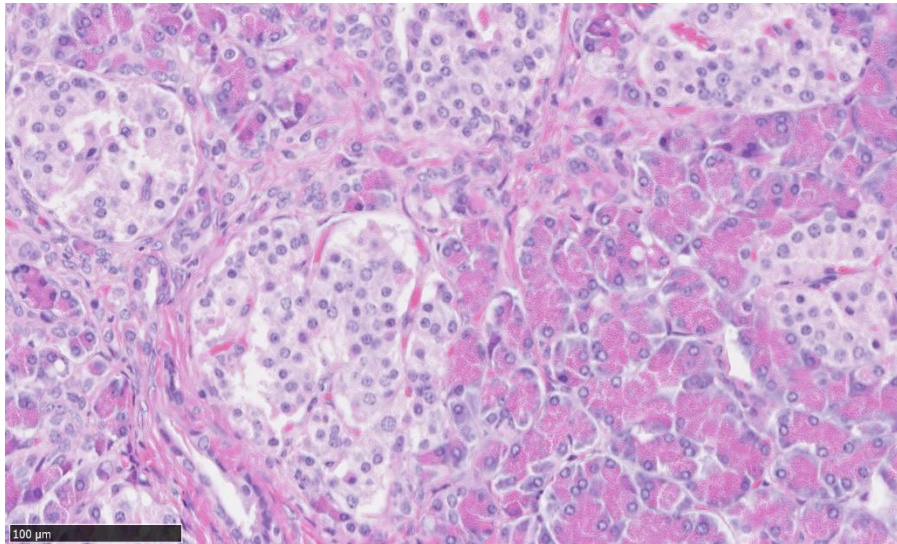

Supplemental Figure 6.

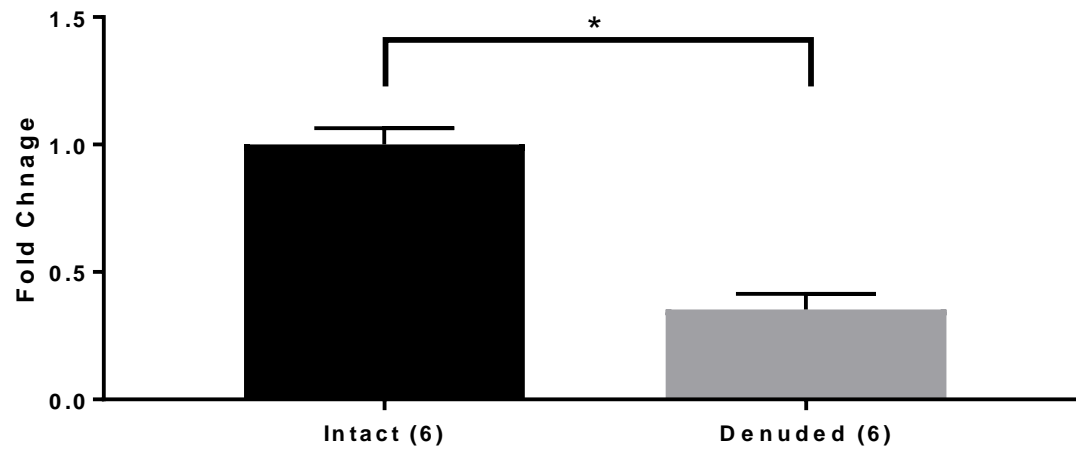

Supplemental Figure 6.

**A**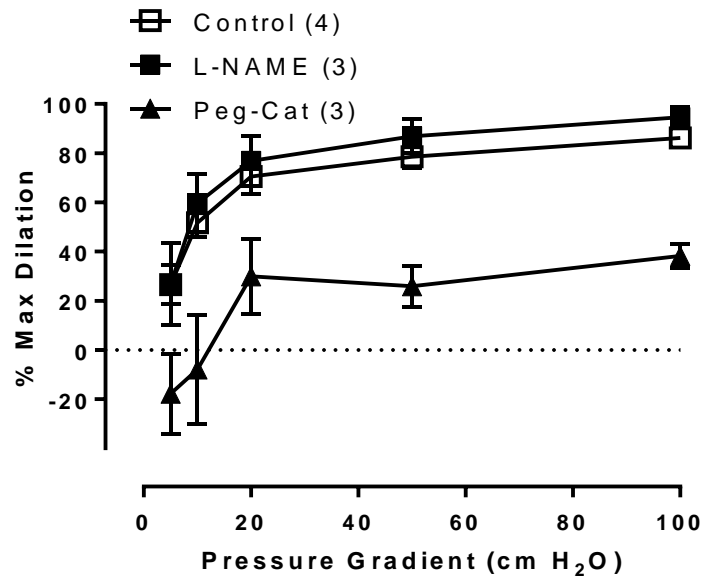**B**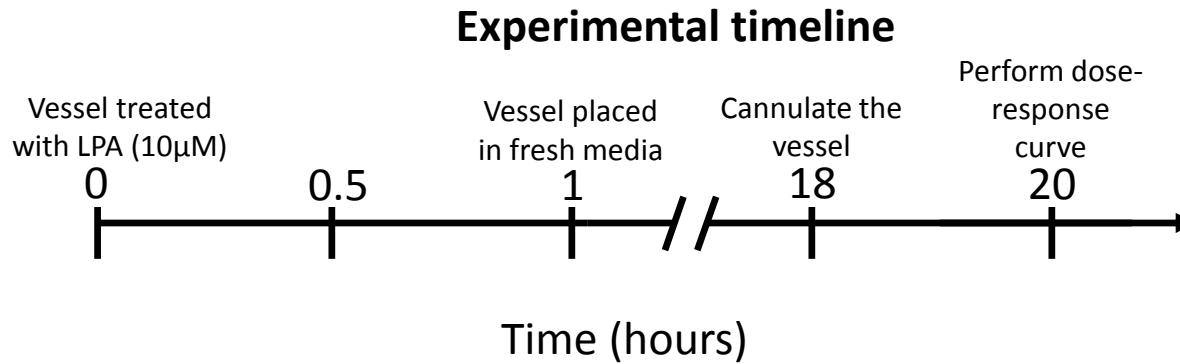

Supplement: BPH-175-4266-s001.pdf [file BPH-175-4266-s001.pdf]
